# Supplementary material for: Adsorbing the magnetic superhalogen MnCl3 to realize intriguing half-metallic and spin-gapless-semiconducting behavior in zigzag or armchair SiC nanoribbon
Source: Royal Society of Chemistry journal article supplement (doi:10.1039/c8ra01632a), 2018-01-01
Supplement: c8ra01632a1.pdf [file c8ra01632a1.pdf]

# Electronic Supplementary Information

## Adsorbing the Magnetic Superhalogen $\text{MnCl}_3$ to Realize the Intriguing Half-metallicity and Spin-Gapless-Semiconductor in Zigzag or Armchair SiC Nanoribbon

Hui Li, Guangtao Yu\*, Zengsong Zhang, Yanfeng Ma, Xuri Huang, Wei Chen\*

*Laboratory of Theoretical and Computational Chemistry, Institute of Theoretical  
Chemistry, International Joint Research Laboratory of Nano-Micro Architecture  
Chemistry, Jilin University, Changchun 130023, People's Republic of China*

\*To whom correspondence should be addressed. Email: [yugt@jlu.edu.cn](mailto:yugt@jlu.edu.cn) (G.Y.),  
[w\\_chen@jlu.edu.cn](mailto:w_chen@jlu.edu.cn) (W.C.)

### ( I ) The computational test on the modified 8-zSiCNR and 13-aSiCNR systems with superhalogen $\text{MnCl}_3$ at the center

When adsorbing the superhalogen  $\text{MnCl}_3$  at the ribbon center for 8-zSiCNR and 13-aSiCNR, we consider all four possible adsorption sites for the Mn atom in  $\text{MnCl}_3$  including the top site of C atom ( $T_C$ ), top site of Si atom ( $T_{Si}$ ), bridge site over Si-C bond ( $B$ ) and hollow site of SiC hexagon ring ( $H$ ). The computed results reveal that the modified zSiCNR or aSiCNR configuration with the  $\text{MnCl}_3$  at the bridge site of ribbon center cannot be obtained. Consequently, we can respectively obtain three conformations for the  $\text{MnCl}_3$ -modified 8-zSiCNR and 13-aSiCNR systems at the center (Figures S1 and S2). By comparison, we can find that adsorbing the  $\text{MnCl}_3$  at the top of C atom ( $T_C$ ) can obtain the most energetically stable configurations for the modified zSiCNR and aSiCNR systems (Figures S1 and S2), and they have been correspondingly named as  $\text{MnCl}_3\text{-}T_C\text{-8-zSiCNR-center}$  and  $\text{MnCl}_3\text{-}T_C\text{-13-aSiCNR-center}$  in the main text.

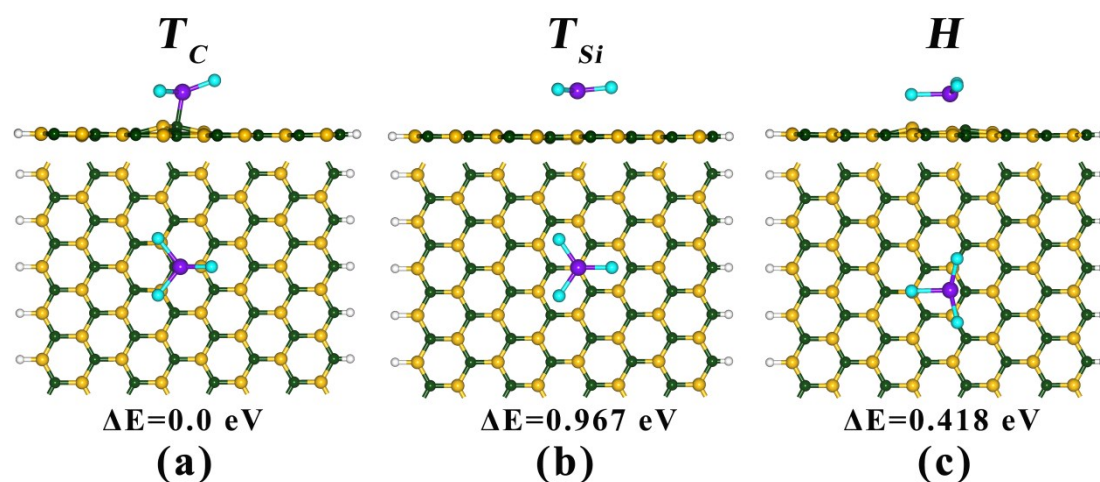

**Figure S1** The side view and top view of modified 8-zSiCNR with the superhalogen  $\text{MnCl}_3$  at the ribbon center, and the relative energy  $\Delta E$  (eV) between the  $\text{MnCl}_3$ -modified 8-zSiCNR systems at three different adsorption sites including (a)  $T_C$ , (b)  $T_{Si}$  and (c)  $H$ .

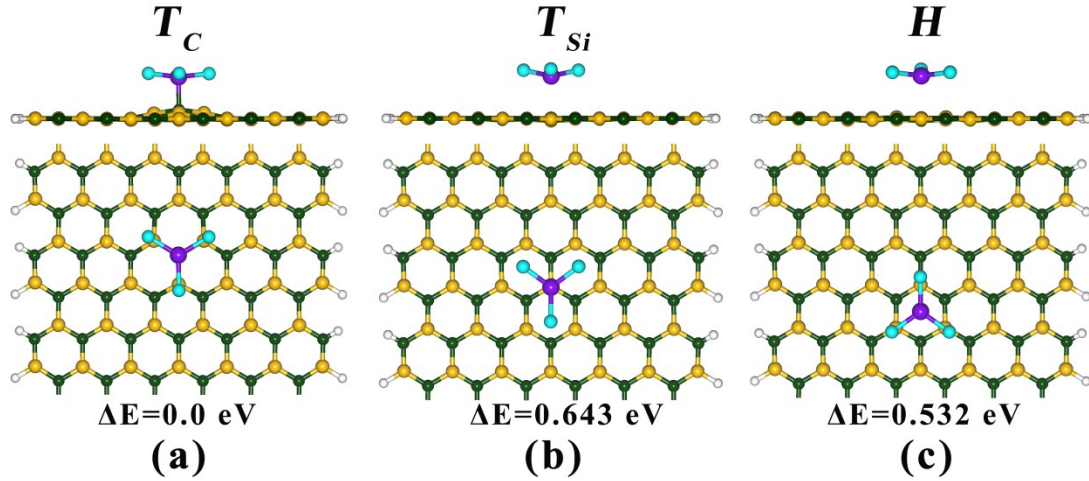

**Figure S2** The side view and top view of modified 13-aSiCNR with the superhalogen  $\text{MnCl}_3$  at the ribbon center, and the relative energy  $\Delta E$  (eV) between the  $\text{MnCl}_3$ -modified 13-aSiCNR systems at three different adsorption sites including (a)  $T_C$ , (b)  $T_{Si}$  and (c)  $H$ .

## (II) The computational test on the $\text{MnCl}_3$ -modified SiCNR systems by using the double supercell

**Table S1.** The relative energies  $\Delta E$  (meV) between the parallel and antiparallel couplings of two neighboring  $\text{MnCl}_3$  for the modified SiCNR systems. Note that these modified SiCNR systems with two  $\text{MnCl}_3$  in the supercell can be denoted by adding (double) into the names of corresponding ones with one  $\text{MnCl}_3$ .

| Systems                                                    | $\Delta E$ (meV) |              |
|------------------------------------------------------------|------------------|--------------|
|                                                            | Parallel         | Antiparallel |
| $\text{MnCl}_3$ - $T_C$ -6-zSiCNR- <i>eSi</i> (double)     | 0.0              | 1.5          |
| $\text{MnCl}_3$ - $T_C$ -8-zSiCNR- <i>eSi</i> (double)     | 0.0              | 4.3          |
| $\text{MnCl}_3$ - $T_C$ -8-zSiCNR- <i>center</i> (double)  | 0.0              | 1.4          |
| $\text{MnCl}_3$ - $T_C$ -8-zSiCNR- <i>eC</i> (double)      | 0.0              | 65.4         |
| $\text{MnCl}_3$ - $T_C$ -9-aSiCNR- <i>edge</i> (double)    | 0.0              | 3.2          |
| $\text{MnCl}_3$ - $T_C$ -11-aSiCNR- <i>edge</i> (double)   | 0.0              | 1.2          |
| $\text{MnCl}_3$ - $T_C$ -13-aSiCNR- <i>edge</i> (double)   | 0.0              | 3.5          |
| $\text{MnCl}_3$ - $T_C$ -13-aSiCNR- <i>center</i> (double) | 0.0              | 3.3          |
